# Supplementary material for: Calibrating PSAT tridimensional acceleration data for the estimation of fish swimming speed and activity
Source: Research Square preprint supplement (doi:10.21203/rs.3.rs-7304544/v1), 2025-08-26
Supplement: Supplementary file 1 [file 8050b1ef4bff1c9b062ac09f.docx]

**Calibrating PSAT tridimensional acceleration data for the estimation of fish swimming speed and activity**

Lucas Martin*, Institut des sciences de la mer, Université du Québec à Rimouski, 310, allée des Ursulines, C.P. 3300 succ. A, Rimouski, Québec G5L 3A1, Canada

Hugues P. Benoît, Maurice Lamontagne Institute, Fisheries and Oceans Canada, Mont-Joli, QC G5H 3Z4, Canada

Jonathan A.D. Fisher, Centre for Fisheries Ecosystems Research, Fisheries and Marine Institute, Memorial University of Newfoundland, P.O. Box 4920, St. John’s, NL A1C 5R3, Canada

Dominique Robert, Institut des sciences de la mer, Université du Québec à Rimouski, 310, allée des Ursulines, C.P. 3300 succ. A, Rimouski, Québec G5L 3A1, Canada

Correspondence: lucas.martin@uqar.ca

**

**

Figure A1: Histograms of velocities over the deployment period in two moored PSATs (M1/M2) and 43 Atlantic halibut. The vertical dotted red line represents the threshold between active and inactive behaviour (38.5°).





Figure A1 (continued): Histograms of velocities over the deployment period in two moored PSATs (M1/M2) and 43 Atlantic halibut. The vertical dotted red line represents the threshold between active and inactive behaviour (38.5°).

Table A1: Halibut percentage of estimated time spent actively swimming and mean swimming speed during these periods over the deployment period.

| PSAT ID | Fork length (cm) | Percentage of estimated time spent actively swimming (%) | Mean swimming speed (m s-1) |
| --- | --- | --- | --- |
| 16P2437 | 164 | 35.53 | 0.82 |
| 17P0086 | 146 | 15.35 | 1.01 |
| 17P0087 | 148 | 3.66 | 0.81 |
| 17P0126 | 145 | 5.21 | 0.73 |
| 17P0127 | 147 | 4.86 | 0.60 |
| 17P0135 | 159 | 18.81 | 0.69 |
| 17P0136 | 138 | 11.71 | 0.76 |
| 17P0138 | 166 | 7.87 | 0.77 |
| 17P0140 | 161 | 4.78 | 1.01 |
| 17P0143 | 146 | 12.82 | 0.61 |
| 17P0147 | 171 | 11.77 | 0.65 |
| 17P0148 | 171 | 24.60 | 0.78 |
| 17P0149 | 150 | 5.92 | 0.71 |
| 17P0150 | 155 | 28.80 | 0.62 |
| 17P0154 | 180 | 16.82 | 0.74 |
| 17P0155 | 160 | 24.79 | 0.78 |
| 17P0159 | 146 | 9.29 | 0.58 |
| 17P0162 | 143 | 8.11 | 0.69 |
| 17P0165 | 130 | 12.10 | 0.65 |
| 17P0166 | 135 | 15.94 | 0.64 |
| 17P0169 | 130 | 11.06 | 0.70 |
| 17P0170 | 139 | 23.79 | 0.73 |
| 17P0171 | 165 | 7.63 | 0.69 |
| 17P0173 | 168 | 11.37 | 0.85 |
| 17P0176 | 202 | 13.30 | 1.13 |
| 18P1571 | 118 | 9.46 | 0.67 |
| 18P1585 | 87 | 6.54 | 0.61 |
| **PSAT ID** | **Fork length (cm)** | **Percentage of estimated time spent actively swimming (%)** | **Mean swimming speed (m s-1)** |
| 18P1588 | 164 | 17.33 | 0.82 |
| 18P1589 | 135 | 6.22 | 0.67 |
| 18P1590 | 165 | 18.35 | 0.73 |
| 18P1592 | 147 | 13.88 | 0.68 |
| 18P1593 | 175 | 14.51 | 0.43 |
| 18P1594 | 160 | 4.94 | 0.74 |
| 18P1601 | 189 | 18.58 | 0.81 |
| 18P1603 | 136 | 5.63 | 0.51 |
| 18P1605 | 153 | 10.53 | 0.59 |
| 18P1607 | 156 | 7.57 | 0.82 |
| 18P1670 | 138 | 25.48 | 0.71 |
| 18P1673 | 133 | 6.51 | 0.68 |
| 18P1737 | 184 | 23.26 | 0.62 |
| 19P0260 | 158 | 19.61 | 0.88 |
| 19P0469 | 99 | 15.43 | 0.68 |
| 19P0470 | 105 | 27.78 | 0.75 |
| **Mean** | **150.39 ± 3.46** | **13.90 ± 1.18** | **0.72 ± 0.02** |
